# Supplementary material
Source: HighWire-hosted journal article supplement (https://bmjopenquality.bmj.com/content/11/4/e001899)
Supplement: inline-supplementary-material-1 [file inline-supplementary-material-1.pdf]

## Discharge Order Set Modification

### ▼ Alcohol Use and Harm Reduction

- An Inpatient Treatment and Discharge Planning Protocol for Alcohol Dependence: Efficacy in Reducing 30-Day Readmissions and Emergency Department Visits

### ▼ Alcohol Use and Harm Reduction

#### Behavioral Modification Panel

Please print the patient brochure.

- [Patient Brochure](#)

#### Alcohol Cessation Handouts/Education

Prior to Discharge please provide patient education brochures "Rethinking Drinking" and "Finding and Getting Help" (available to print in Reference)

#### SOCIAL SERVICES/ SOCIAL WORKER CONSULT

Alcohol Use Disorder: For Mutual Support Groups and other Resources

#### Addiction Psychiatry - ONLY IF UCD PCP

#### Medication Assisted Therapy

**Use Naltrexone in caution with patients who have opiates within last 7 days or LFT's 3x or greater than normal**

ALT: AST:

#### Naltrexone (REVIA) Tablet - preferred in patients not on opiates

Disp-30 tablet, R-0

#### Acamprosate (CAMPRAL) Tablet - preferred in patients on opiates

Disp-180 tablet, R-0

#### Disulfiram Tablet

500 mg, Disp-14 tablet, R-0

## Alcohol Withdrawal Order Set Modification

### ▼ MEDICATION ASSISTED THERAPY

#### ▼ Medications

##### Naltrexone:

Use with caution with patients who have opiates within last 7 days or LFT's 3x or greater than normal (reconsider use in any instances of acute hepatitis of transaminase level)

Prominent Side Effects include nausea and vomiting (29-33%)

ALT: AST:

##### Acamprosate

Contraindicated w/ CrCl <30 ml/min

Reduce Target Dose for weight less than 60 Kg or CrCl between 30-50 mL/min to: 333 mg PO TID

Prominent Side Effects include diarrhea

Wt Readings from Last 1 Encounters:

01/11/21 71.5 kg (157 lb 10.1 oz)

Estimated Creatinine Clearance: 122.4 mL/min (by C-G formula based on SCr of 0.86 mg/dL).

Naltrexone (REVIA) Tablet

50 mg, ORAL, DAILY MORNING

Acamprosate (CAMPRAL) Delayed Release Tablet

666 mg, ORAL, THREE TIMES DAILY

### ▼ CONSULTS

#### ▶ Substance Use Consults

Substance Use Navigator (SUN) - 4182

Placing this order will put the patient in the queue for a Substance Use Navigator (SUN), but for immediate assistance, please call/page the on-call SUN. SUN concerned for active opioid withdrawal or other complex cases, the Substance Use Intervention Team (SUIT) of physicians is also available 24/7 (see the SUIT - SUN may also escalate the consult to the SUIT at any time if deemed necessary.
